# Supplementary material
Source: PubMed Central journal article supplement (PMC7474903)
Supplement: mmc1.pdf [file mmc1.pdf]

**Cell, Volume 183**

## **Supplemental Information**

### **Molecular Architecture of the SARS-CoV-2 Virus**

**Hangping Yao, Yutong Song, Yong Chen, Nanping Wu, Jialu Xu, Chujie Sun, Jiaxing Zhang, Tianhao Weng, Zheyuan Zhang, Zhigang Wu, Linfang Cheng, Danrong Shi, Xiangyun Lu, Jianlin Lei, Max Crispin, Yigong Shi, Lanjuan Li, and Sai Li**

**Table S1. Cryo-ET Data collection and reconstruction statistics. Related to Figure 1.**

| <b>Data collection</b>                     |                               |                             |              |                     |                      |                |
|--------------------------------------------|-------------------------------|-----------------------------|--------------|---------------------|----------------------|----------------|
| Microscope                                 | Titan Krios                   |                             |              |                     |                      |                |
| Voltage (kV)                               | 300                           |                             |              |                     |                      |                |
| Detector                                   | Gatan K3                      |                             |              |                     |                      |                |
| Energy filter                              | Gatan GIF Quantum, 20 eV slit |                             |              |                     |                      |                |
| Pixel size (Å)                             | 0.68 (super-resolution)       |                             |              |                     |                      |                |
| Tilt schemes                               | Dose-symmetric scheme         |                             |              |                     |                      |                |
| Number of tilt-series                      | 319                           |                             |              |                     |                      |                |
| Number of virions                          | 2,294                         |                             |              |                     |                      |                |
| Exposure (e <sup>-</sup> /Å <sup>2</sup> ) | 131.2                         |                             |              |                     |                      |                |
| Defocus range (µm)                         | -1.7 ~ -5.0                   |                             |              |                     |                      |                |
| Software                                   | SerialEM                      |                             |              |                     |                      |                |
| <b>Reconstruction</b>                      |                               |                             |              |                     |                      |                |
| Software                                   | Dynamo 1.1.333, Relion 2.0    |                             |              |                     |                      |                |
| Data set                                   | Prefusion S<br>(RBD down)     | Prefusion S<br>(one RBD up) | Postfusion S | RNP<br>(individual) | RNP<br>(tetrahedron) | RNP<br>(hexon) |
| Final number of particles                  | 25,236                        | 21,080                      | 1,954        | 18,500              | 3,659                | 2,270          |
| Symmetry imposed                           | C3                            | C1                          | C3           | C1                  | C3                   | C6             |
| Final Resolution (Å)                       | 8.7                           | 10.9                        | 15.3         | 13.1                | N/A                  | N/A            |
| Gold-standard                              | yes                           | yes                         | yes          | yes                 | no                   | no             |
| FSC threshold                              | 0.143                         | 0.143                       | 0.143        | 0.143               | N/A                  | N/A            |
| Final pixelsize (Å)                        | 1.36                          | 2.72                        | 2.72         | 2.72                | 5.44                 | 5.44           |
| Map sharpening B-factor (Å <sup>2</sup> )  | -1200                         | -2000                       | N/A          | N/A                 | N/A                  | N/A            |
